# Supplementary material
Source: publisher figshare collection journal article supplement (https://sage.figshare.com/ndownloader/files/19496951)
Supplement: Supplementary file 1 [file 19496951]

Table S1

*Factors associated with supervision noncompliance among youth with contemporaneous YLS/CMI data (N = 103 youths)*

| <i>Bivariate analysis</i>                | <i>b</i> | <i>SE (b)</i> | <i>p</i> | OR   | 95% CI        |
|------------------------------------------|----------|---------------|----------|------|---------------|
| YLS/CMI total score                      | 0.12     | .05           | .019     | 1.13 | [1.02, 1.24]  |
| <i>Multivariate analysis</i>             | <i>b</i> | <i>SE (b)</i> | <i>p</i> | OR   | 95% CI        |
| YLS/CMI total score                      | 0.12     | .07           | .063     | 1.13 | [0.99, 1.29]  |
| Female (referent: male)                  | 0.30     | .84           | .721     | 1.35 | [0.26, 6.97]  |
| Minority racial status (referent: White) | 1.30     | .76           | .088     | 3.65 | [0.83, 16.18] |
| Age at disposition                       | 0.57     | .39           | .140     | 1.78 | [0.83, 3.80]  |
| Age at first referral                    | -0.31    | .33           | .349     | 0.74 | [0.39, 1.40]  |
| Felony-level charge                      | -0.74    | .82           | .365     | 0.48 | [0.10, 2.37]  |
| Prior supervision disposition            | -2.24    | .97           | .021     | 0.11 | [0.02, 0.71]  |
| Underwent pre-adjudication supervision   | 0.95     | .81           | .236     | 2.60 | [0.54, 12.59] |
| Number of requirements                   | 0.33     | .16           | .036     | 1.39 | [1.02, 1.88]  |

Table S2

*Factors linked to revocation at probation review hearings among youth with contemporaneous YLS/CMI data (N = 144 hearings across 45 youths)*

| <i>Bivariate analysis</i>                | <i>p</i> | OR   | 95% CI        |
|------------------------------------------|----------|------|---------------|
| YLS/CMI total score                      | .258     | 1.06 | [0.96, 1.18]  |
| <i>Multivariate analysis</i>             | <i>p</i> | OR   | 95% CI        |
| Youth-specific factors                   |          |      |               |
| YLS/CMI total score                      | .114     | 1.14 | [0.97, 1.33]  |
| Female (referent: male)                  | .228     | 0.35 | [0.06, 1.93]  |
| Minority racial status (referent: White) | .219     | 3.09 | [0.51, 18.70] |
| Age at hearing                           | .150     | 0.70 | [0.44, 1.14]  |
| Noncompliant behaviors <sup>+</sup>      |          |      |               |
| Number of types of noncompliance         | .201     | 1.25 | [0.89, 1.75]  |

<sup>+</sup>Noncompliant behaviors were documented in probation officer notes in the time period preceding the examined hearing, after the previous non-continued hearing.

Table S3

*Factors linked to failure to appear at review hearings among youth with contemporaneous YLS/CMI data (N = 326 hearings across 103 youths)*

| <i>Bivariate analysis</i>              | <i>p</i> | OR   | 95% CI        |
|----------------------------------------|----------|------|---------------|
| YLS/CMI total score                    | .513     | 0.98 | [0.91, 1.05]  |
| <i>Multivariate analysis</i>           | <i>p</i> | OR   | 95% CI        |
| Youth-specific factors                 |          |      |               |
| YLS/CMI total score                    | .296     | 0.97 | [0.91, 1.03]  |
| Female (referent: male)                | .025     | 4.49 | [1.21, 16.71] |
| Age at hearing                         | .412     | 1.16 | [0.81, 1.66]  |
| Underwent pre-adjudication supervision | .365     | 0.55 | [0.15, 2.00]  |
| Noncompliant behaviors <sup>+</sup>    |          |      |               |
| Number of types of noncompliance       | .921     | 0.98 | [0.61, 1.57]  |

<sup>+</sup>Noncompliant behaviors were documented in probation officer notes in the time period preceding the examined hearing, after the previous non-continued hearing.
